# Supplementary material for: Inhibition of Adult Neurogenesis in Male Mice after Repeated Exposure to Paracetamol Overdose
Source: MDPI journal article supplement (doi:10.3390/ijms25041964), 2024-02-06

Supplementary Materials:

Figure S1: Representative micrographs of occludin expression in the hippocampus of control or repeated administration of acetaminophen (APAP) at a dose of 750 mg/kg/day treated mice.

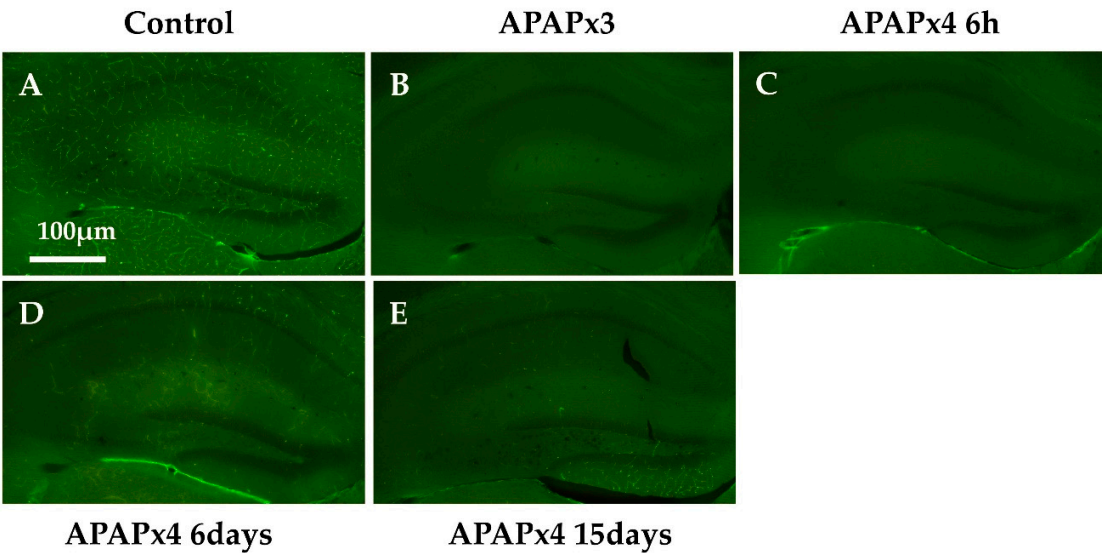

Figure S2: The reduced glutathione (GSH)/oxidized glutathione (GSSG) ratio in the hypothalamus and plasma of control or three repeated administration of acetaminophen (APAPx3) at a dose of 750 mg/kg treated mice.

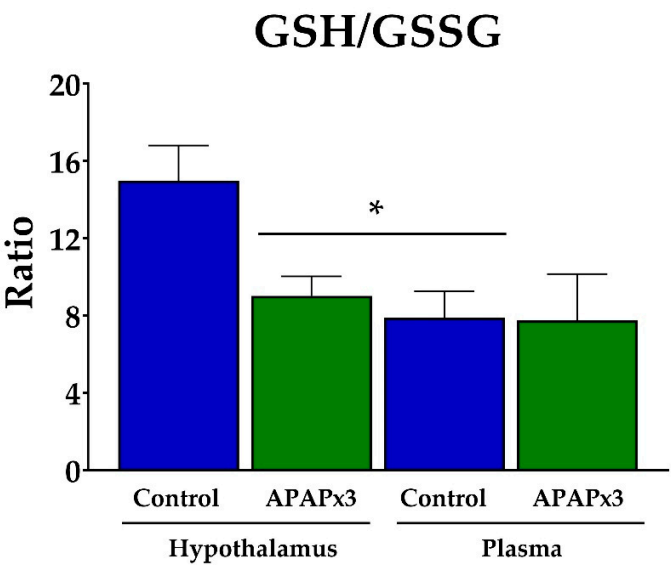

Supplement: s1 [file s1]
